# Supplementary material for: Oral Capsaicinoid Administration Alters the Plasma Endocannabinoidome and Fecal Microbiota of Reproductive-Aged Women Living with Overweight and Obesity
Source: MDPI journal article supplement (doi:10.3390/biomedicines9091246), 2021-09-17

**Table S1:** Reported symptoms and inventory of collected samples.

| Number  | Age | Reported Symptoms                                                                    | Completed trial (C) / Dropout (DO) | Blood samples |    | Stool samples |    |
|---------|-----|--------------------------------------------------------------------------------------|------------------------------------|---------------|----|---------------|----|
|         |     |                                                                                      |                                    | V1            | V7 | V1            | V7 |
| CAE-001 | 23  | Little                                                                               | C                                  | -             | -  | -             | -  |
| CAE-002 | 20  | Little. Vomiting. Transient constipation                                             | C                                  | -             | -  | -             | -  |
| CAE-003 | 40  | At first: Cramps and diarrhea. then constipation. stomach ache                       | C                                  | -             | -  | -             | -  |
| Pla-004 | 39  | At first: Headache. heartburn. stools more frequent and loose                        | C                                  | -             | -  | -             | -  |
| Pla-005 | 19  | None                                                                                 | C                                  | -             | -  | -             | -  |
| CAE-006 | 27  | None                                                                                 | C                                  | -             | -  | -             | -  |
| Pla-007 | 34  | None                                                                                 | C                                  | -             | -  | -             | -  |
| CAE-008 | 31  | At first: Stools more frequent. headache. heartache                                  | C                                  | -             | -  | -             | -  |
| Pla-009 | 23  | None                                                                                 | DO                                 | -             | -  | -             | -  |
| CAE-010 | 44  | Burning sensation in the rectum a few days. diarrhea. nausea. stomach ache. vomiting | C                                  | -             | -  | -             | -  |
| CAE-011 | 27  | V5 and up: nausea. sweating. intestinal burning                                      | C                                  | -             | -  | -             | -  |
| Pla-012 | 40  | At first: Sensation of acidity in the stomach 1 time                                 | C                                  | -             | -  | -             | -  |
| CAE-013 | 44  | None                                                                                 | C                                  | -             | -  | -             | -  |
| CAE-014 | 24  | At first: Bowel pain. lower abmen. poor appetite                                     | DO                                 | -             | -  | -             | -  |
| Pla-015 | 21  | None                                                                                 | C                                  | -             | -  | -             | -  |
| Pla-016 | 28  | None                                                                                 | C                                  | -             | -  | -             | -  |
| Pla-017 | 34  | V3 and V5: heartburn                                                                 | C                                  | -             | -  | -             | -  |
| Pla-018 | 40  | None                                                                                 | DO                                 | -             | -  | -             | -  |
| Pla-019 | 41  | None                                                                                 | C                                  | x             | x  | x             | x  |
| CAE-020 | 25  | Intestine and stomach level bar. cramps. V3: Sweating. V5-6: Belly ache              | C                                  | x             | x  | -             | -  |
| Pla-022 | 34  | At first: Stool more frequent. then constipation. nausea                             | C                                  | x             | x  | -             | -  |
| CAE-023 | 26  | Heat and sweats. more appetite. hot flashes. gas and bloating                        | C                                  | x             | x  | -             | -  |
| Pla-024 | 25  | None                                                                                 | DO                                 | -             | -  | -             | -  |
| CAE-025 | 21  | Burning sensation. stomach pain. vomiting in PM. previous stomach ache               | C                                  | x             | x  | -             | -  |
| Pla-026 | 50  | None                                                                                 | C                                  | x             | x  | x             | x  |
| CAE-027 | 47  | V3: Red urine. Migraine                                                              | DO                                 | x             | -  | x             | -  |
| CAE-028 | 28  | Headache. burning and stomach pain. vomiting. pain                                   | DO                                 | x             | -  | x             | -  |

|                |    |                                                                                                                        |    |   |   |   |   |
|----------------|----|------------------------------------------------------------------------------------------------------------------------|----|---|---|---|---|
|                |    | and burning during bowel movements                                                                                     |    |   |   |   |   |
| <b>Pla-029</b> | 21 | None                                                                                                                   | C  | x | x | x | x |
| <b>Pla-030</b> | 25 | None                                                                                                                   | C  | - | - | - | - |
| <b>CAE-031</b> | 35 | None                                                                                                                   | C  | x | x | x | x |
| <b>Pla-032</b> | 29 | At first: Diarrhea                                                                                                     | DO | x | - | x | - |
| <b>CAE-033</b> | 26 | At first: Gastro-oesophageal reflux. flatulence. diarrhea                                                              | C  | x | x | x | x |
| <b>CAE-034</b> | 26 | None                                                                                                                   | DO | x | - | - | - |
| <b>Pla-035</b> | 26 | At first: Dry mouth. flatulence and night sweats                                                                       | C  | x | x | x | x |
| <b>Pla-036</b> | 21 | V3: no symptoms but nausea if not eating within hours of taking                                                        | DO | x | - | x | - |
| <b>CAE-037</b> | 47 | Gurgling the first days                                                                                                | DO | x | - | - | - |
| <b>CAE-038</b> | 22 | None                                                                                                                   | C  | - | - | x | - |
| <b>Pla-039</b> | 26 | None                                                                                                                   | C  | x | x | - | - |
| <b>CAE-040</b> | 30 | Diarrhea and heartburn. headache. vomiting                                                                             | DO | - | - | x | - |
| <b>Pla-041</b> | 25 | At first: Dizziness                                                                                                    | C  | x | x | x | x |
| <b>Pla-042</b> | 25 | V4: Bloating and stomachaches                                                                                          | C  | x | x | x | x |
| <b>CAE-043</b> | 22 | Morning canceled                                                                                                       | DO | - | - | x | - |
| <b>Pla-044</b> | 23 | V2: Tremors and heartaches                                                                                             | C  | - | - | x | x |
| <b>CAE-045</b> | 23 | Stomach burns. spasms. reflux. bloating                                                                                | DO | - | - | - | - |
| <b>CAE-046</b> | 24 | Heartache. vomiting. stomach cramps. loose stools                                                                      | C  | x | - | - | - |
| <b>Pla-047</b> | 28 | V3: Diarrhea and nausea                                                                                                | C  | x | x | x | x |
| <b>CAE-048</b> | 38 | Constipation. blood in the stools. stinging and burning stools                                                         | C  | x | x | x | x |
| <b>Pla-049</b> | 25 | None                                                                                                                   | C  | x | x | x | x |
| <b>CAE-050</b> | 22 | Constipation and burning during evacuation. hard stools. diarrhea. stomachaches. headache. dizziness. intense migraine | DO | x | - | - | - |
| <b>Pla-051</b> | 35 | None except V6 stomach pains ++ after 6 oranges                                                                        | C  | x | x | x | x |
| <b>Pla-052</b> | 36 | None                                                                                                                   | C  | - | - | x | x |
| <b>CAE-053</b> | 24 | Discomfort. vomiting. loose stools. cramps. abdominal pain. stinging stools. diarrhea. nausea and stomach discomfort   | C  | x | x | x | x |
| <b>Pla-055</b> | 33 | At first: Hot flashes. V6: mild heartburn                                                                              | C  | x | x | - | - |
| <b>CAE-056</b> | 45 | V4: loss of appetite. less hunger and less sugar rage                                                                  | DO | x | - | - | - |
| <b>Pla-057</b> | 20 | At first: V2-3: Headache. 1 episode of vomiting                                                                        | C  | x | x | x | - |

|                |    |                                                                                                         |    |   |   |   |   |
|----------------|----|---------------------------------------------------------------------------------------------------------|----|---|---|---|---|
| <b>Pla-058</b> | 29 | None                                                                                                    | C  | - | - | x | x |
| <b>CAE-059</b> | 27 | At first: Bellyache. loose stools.<br>pressure drop                                                     | C  | x | x | - | - |
| <b>CAE-060</b> | 31 | Vomiting. stomach pain and<br>gas ++. heartburn. burping.<br>bloating                                   | C  | x | x | x | x |
| <b>CAE-061</b> | 20 | Sudden epigastric abdominal<br>pain 10/10. loss of<br>consciousness. hospital<br>transport by ambulance | DO | - | - | - | - |
| <b>CAE-062</b> | 24 | Bellyache. stomach. burning<br>and swelling in the stomach.<br>gas and burps. diarrhea                  | C  | x | x | x | x |
| <b>Pla-063</b> | 19 | Gurgling                                                                                                | DO | - | - | - | - |

**Table S2:** List of the lipid mediators used as deuterated internal standards for LC/MS-MS analyses

| <b>Abbreviation</b>               | <b>Internal standards utilized</b>                               |
|-----------------------------------|------------------------------------------------------------------|
| <b>2-AG</b>                       | d5-Mono-arachidonoyl-glycerol 1(3) and 2 isomers                 |
| <b>AA</b>                         | d8-Arachidonic acid                                              |
| <b>AEA</b>                        | d4-Anandamide                                                    |
| <b>Arachidonoyl Glycine</b>       | d8- <i>N</i> -Arachidonoyl Glycine                               |
| <b>Arachidonoyl Serotonin</b>     | <i>N</i> -Arachidonoyl Serotonin                                 |
| <b>DHA</b>                        | d5-Docosahexaenoic acid                                          |
| <b>DHEA</b>                       | d4- <i>N</i> -docosahexaenoyl-ethanolamine                       |
| <b>DPA</b>                        | d5-Docosapentaenoic acid                                         |
| <b>2-DPG (n-3)</b>                | d5-Mono-docosapentaenoyl-glycerol 1(3) and 2 isomers             |
| <b>EPA</b>                        | d5-Eicosapentaenoic acid                                         |
| <b>2-EPG</b>                      | d5-Mono-eicosapentaenoyl-glycerol 1(3) and 2 isomers             |
| <b>EPEA</b>                       | d4- <i>N</i> -eicosapentaenoyl-ethanolamine                      |
| <b>LEA</b>                        | d4- <i>N</i> -linoleoyl-ethanolamine                             |
| <b>2-LG</b>                       | d5-Mono-linoleoyl-glycerol 1(3) and 2 isomers                    |
| <b>N-Oleyl-L-Serine</b>           | <i>N</i> -Oleyl-L-Serine                                         |
| <b>2-OG</b>                       | 2-oleoyl-glycerol                                                |
| <b>Oleoyl Serotonin</b>           | d17- <i>N</i> -oleoyl-serotonin                                  |
| <b>OEA</b>                        | d4- <i>N</i> -oleoyl-ethanolamine                                |
| <b>PEA</b>                        | d4- <i>N</i> -palmitoyl-ethanolamine                             |
| <b>2-PG</b>                       | Mono-palmitoyl-glycerol 1(3) and 2 isomers                       |
| <b>PGE2</b>                       | d4-Prostaglandin E2                                              |
| <b>PGE2-EA</b>                    | d4-Prostaglandin E2 ethanolamide (prostamide E2)                 |
| <b>PGE2-G</b>                     | d5-Prostaglandin E2 glycerol                                     |
| <b>PGF2<math>\alpha</math>-EA</b> | Prostaglandin F2 $\alpha$ ethanolamide (prostamide F2 $\alpha$ ) |
| <b>Stearoyl-EA</b>                | d3- <i>N</i> -stearoyl-ethanolamine                              |

### **Legends to Supplementary Figures:**

**Figure S1:** Effect of Capsimax and caloric restriction on relative abundance of fecal bacterial genera of 15 participants (9 placebo and 6 Capsimax) overweight or obese reproductive aged-women, before (Visit 1 [V1]) and after (Visit 7 [V7]) the interventions.

**Figure S2:** Correlation between fecal microbiota taxa at phylum (A), classed (B) and genera (C) levels and BMI, waist circumference, fat mass (FM) and fat-free mass (FFM) of 15 participants (9 placebo and 6 Capsimax) overweight or obese reproductive aged-women. The correlation analysis were performed using repeated measures correlation tests (rmcorr package). Only correlations coefficients with p-value < 0.05 are displayed.

**Figure S3:** Correlations between the plasma levels of eCBome mediators and BMI, waist circumference, fat mass (FM) and fat-free mass (FFM) of 15 participants (9 placebo and 6 Capsimax) overweight or obese reproductive aged-women. The correlation analysis was performed using repeated measures correlation tests (rmcorr package). Only correlations coefficients with p-value < 0.05 are displayed. OEA, *N*-oleoyl-ethanolamine; LEA, *N*-linoleoyl-ethanolamine; DPEA, *N*-docosapentaenoyl-ethanolamine; 1/2-OG, 1/2-oleoyl-glycerol; DHA, docosahexaenoic acid; DHEA, *N*-docosahexaenoyl-ethanolamine; PEA, *N*-palmitoyl-ethanolamine.

Figure S1

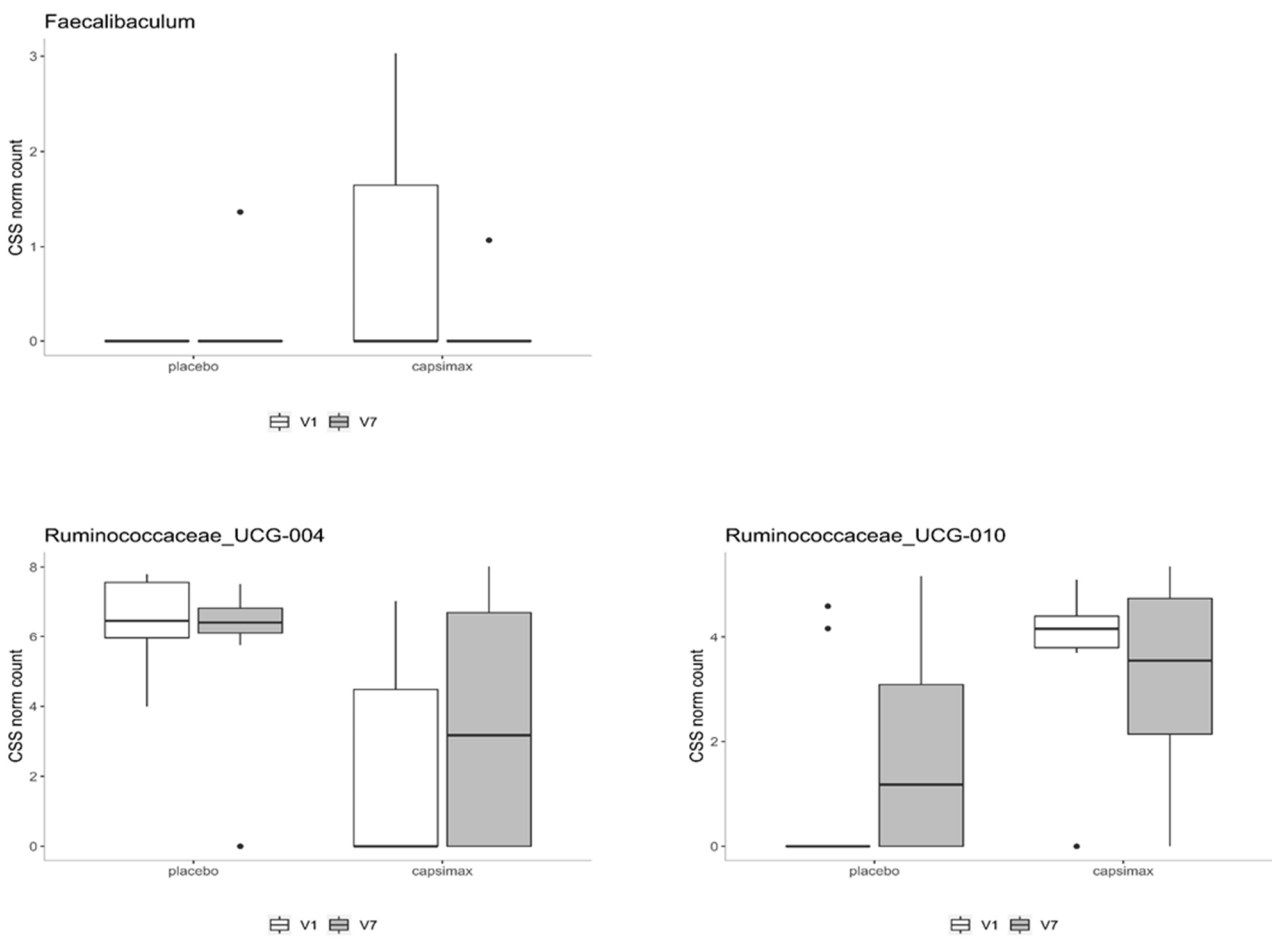

**Figure S2**

**A)**

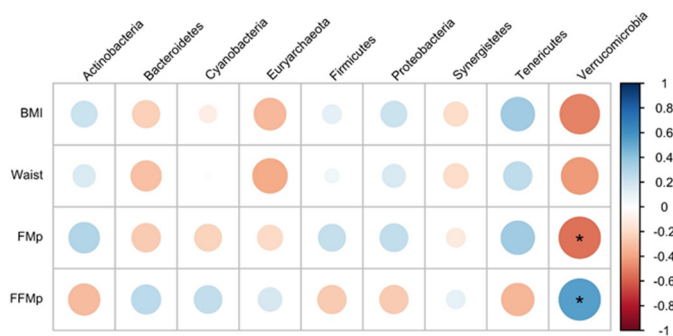

**B)**

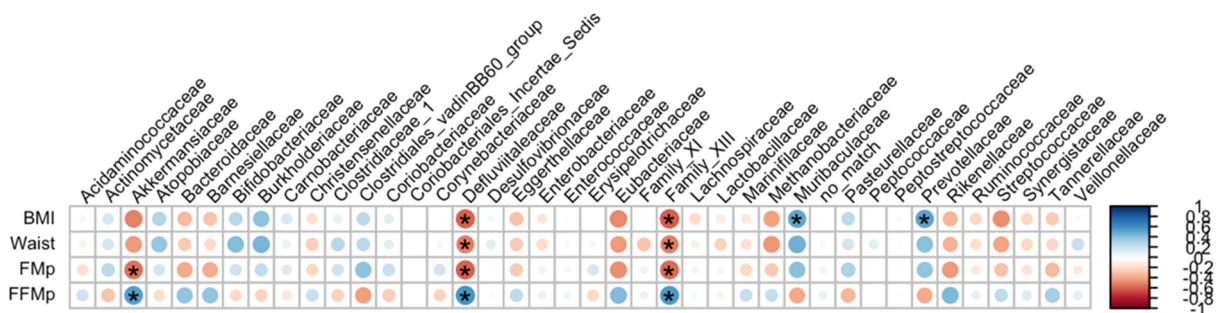

**C)**

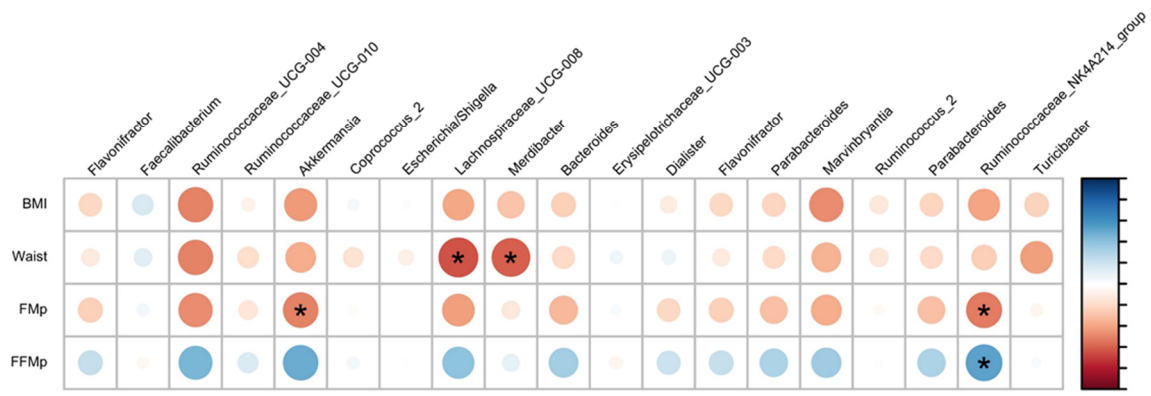

Figure S3

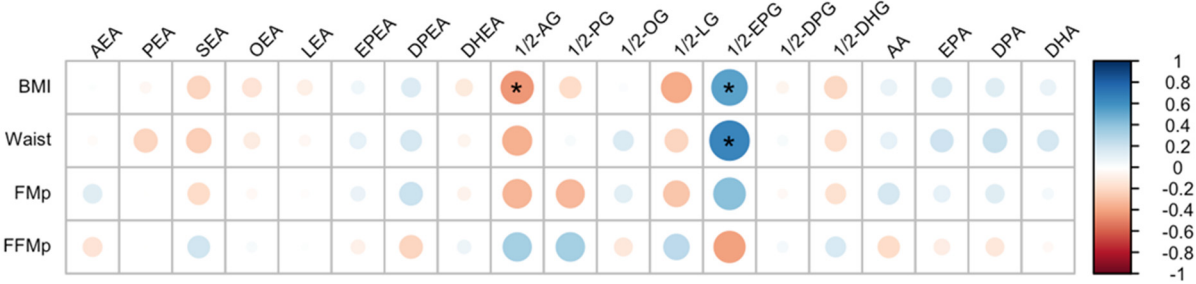

Supplement: s1 [file s1]
